# Supplementary material
Source: MDPI journal article supplement (https://www.mdpi.com/1424-8247/14/11/1141)
Supplement: s1 [file s1]

# Enantioselectivity of Chiral Derivatives of Xanthones in Virulence Effects of Resistant Bacteria

**Fernando Durães**<sup>1,2</sup>, **Sara Cravo**<sup>1,2</sup>, **Joana Freitas-Silva**<sup>2,3</sup>, **Nikoletta Szemerédi**<sup>4</sup>, **Paulo Martins-da-Costa**<sup>2,3</sup>, **Eugénia Pinto**<sup>2,5</sup>, **Maria Elizabeth Tiritan**<sup>1,2,6</sup>, **Gabriella Spengler**<sup>4</sup>, **Carla Fernandes**<sup>1,2\*</sup>, **Emília Sousa**<sup>1,2\*</sup>, **Madalena Pinto**<sup>1,2</sup>

<sup>1</sup> Laboratory of Organic and Pharmaceutical Chemistry, Department of Chemical Sciences, Faculty of Pharmacy, University of Porto, Rua de Jorge Viterbo Ferreira, 228, 4050-313 Porto, Portugal; fduraes5@gmail.com (F.D.); scravo@ff.up.pt (S.C.); madalena@ff.up.pt (M.P.)

<sup>2</sup> CIIMAR – Interdisciplinary Centre of Marine and Environmental Research, University of Porto, Novo Edifício do Terminal de Cruzeiros do Porto de Leixões, Avenida General Norton de Matos, S/N, 4450-208 Matosinhos, Portugal; joanafreitasdasilva@gmail.com (J.F.-S.); pmcosta@icbas.up.pt (P.M.-d.-C.)

<sup>3</sup> ICBAS – Institute of Biomedical Sciences Abel Salazar, Universidade do Porto, Rua de Jorge Viterbo Ferreira 228, 4050-313 Porto, Portugal

<sup>4</sup> Department of Medical Microbiology, Albert Szent-Györgyi Health Center and Faculty of Medicine, University of Szeged, Semmelweis utca 6, 6725 Szeged, Hungary; szemeredi.nikoletta@med.u-szeged.hu (N.S.); spengler.gabriella@med.u-szeged.hu (G.S.)

<sup>5</sup> Laboratory of Microbiology, Department of Biological Sciences, Faculty of Pharmacy, University of Porto, Rua de Jorge Viterbo Ferreira, 228, 4050-313 Porto, Portugal; epinto@ff.up.pt (E.P.)

<sup>6</sup> CESPU, Institute of Research and Advanced Training in Health Sciences and Technologies (IINFACTS), Rua Central de Gandra, 1317, 4585-116 Gandra, Portugal; elizabeth.tiritan@iucs.cespu.pt (M.E.T.)

\* Correspondence: cfernandes@ff.up.pt (C.F.); esousa@ff.up.pt (E.S.)

**Table S1.** Minimum inhibitory concentrations of the compounds in the antibacterial and antifungal activity assays and synergy with antibiotics.

| Compound | Antibacterial activity                      |                                    |                                  |                                |                            |      | Synergy with antimicrobials    |                                  | Antifungal activity              |                                    |                      |
|----------|---------------------------------------------|------------------------------------|----------------------------------|--------------------------------|----------------------------|------|--------------------------------|----------------------------------|----------------------------------|------------------------------------|----------------------|
|          | Minimum Inhibitory Concentration (MIC) (μM) |                                    |                                  |                                |                            |      |                                |                                  |                                  |                                    |                      |
|          | <i>E. coli</i><br>ATCC<br>25922             | <i>P. aeruginosa</i><br>ATCC 27853 | <i>E. faecalis</i><br>ATCC 29212 | <i>S. aureus</i><br>ATCC 29213 | <i>S. aureus</i><br>272123 | SE03 | <i>E. coli</i> SA/2            | <i>E. faecalis</i><br>B3/101     | <i>C. albicans</i><br>ATCC 10231 | <i>A. fumigatus</i><br>ATCC 204305 | <i>T. rubrum</i> FF5 |
|          |                                             |                                    |                                  |                                |                            |      | CTX MIC = 562<br>(256 μg/mL)   | VAN MIC =<br>707 (1024<br>μg/mL) |                                  |                                    |                      |
|          |                                             |                                    |                                  |                                |                            |      | CTX +<br>Compound <sup>1</sup> | VAN +<br>Compound <sup>1</sup>   |                                  |                                    |                      |
| 5        | >100                                        | >100                               | >100                             | >100                           | >100                       | >100 | 562<br>(256 μg/mL)             | 707<br>(1024 μg/mL)              | >100                             | >100                               | >100                 |
| 6        | >100                                        | >100                               | >100                             | >100                           | >100                       | >100 | 141<br>(64 μg/mL)              | 707<br>(1024 μg/mL)              | >100                             | >100                               | >100                 |
| 7        | >100                                        | >100                               | >100                             | >100                           | >100                       | >100 | 562<br>(256 μg/mL)             | 707<br>(1024 μg/mL)              | >100                             | >100                               | >100                 |
| (S,S)-8  | >100                                        | >100                               | >100                             | >100                           | >100                       | >100 | 562<br>(256 μg/mL)             | 707<br>(1024 μg/mL)              | >100                             | >100                               | >100                 |
| (R,R)-8  | >100                                        | >100                               | >100                             | >100                           | >100                       | >100 | 562<br>(256 μg/mL)             | 707<br>(1024 μg/mL)              | >100                             | >100                               | >100                 |
| 9        | >100                                        | >100                               | >100                             | >100                           | >100                       | >100 | 562<br>(256 μg/mL)             | 707<br>(1024 μg/mL)              | >100                             | >100                               | >100                 |
| 10       | >100                                        | >100                               | >100                             | >100                           | >100                       | >100 | 562<br>(256 μg/mL)             | 707<br>(1024 μg/mL)              | >100                             | >100                               | >100                 |
| (S)-11   | >100                                        | >100                               | >100                             | >100                           | >100                       | >100 | 141<br>(64 μg/mL)              | 707<br>(1024 μg/mL)              | >100                             | >100                               | >100                 |
| (R)-11   | >100                                        | >100                               | >100                             | >100                           | >100                       | >100 | 562<br>(256 μg/mL)             | 707<br>(1024 μg/mL)              | >100                             | >100                               | >100                 |
| 12       | >100                                        | >100                               | >100                             | >100                           | >100                       | >100 | 562                            | 707                              | >100                             | >100                               | >100                 |

|                 |      |      |      |      |      |      |                    |                     |      |      |      |
|-----------------|------|------|------|------|------|------|--------------------|---------------------|------|------|------|
|                 |      |      |      |      |      |      | (256 µg/mL)<br>562 | (1024 µg/mL)<br>707 |      |      |      |
| <b>(S)-16</b>   | >100 | >100 | >100 | >100 | >100 | >100 | (256 µg/mL)<br>562 | (1024 µg/mL)<br>707 | >100 | >100 | >100 |
| <b>(R)-16</b>   | >100 | >100 | >100 | >100 | >100 | >100 | (256 µg/mL)<br>562 | (1024 µg/mL)<br>707 | >100 | >100 | >100 |
| <b>(S)-17</b>   | >100 | >100 | >100 | >100 | >100 | >100 | (256 µg/mL)<br>562 | (1024 µg/mL)<br>707 | >100 | >100 | >100 |
| <b>(R)-17</b>   | >100 | >100 | >100 | >100 | >100 | >100 | (256 µg/mL)<br>562 | (1024 µg/mL)<br>707 | >100 | >100 | >100 |
| <b>(S,R)-18</b> | >100 | >100 | >100 | >100 | >100 | >100 | (256 µg/mL)<br>562 | (1024 µg/mL)<br>707 | >100 | >100 | >100 |
| <b>(R,S)-18</b> | >100 | >100 | >100 | >100 | >100 | >100 | (256 µg/mL)<br>562 | (1024 µg/mL)<br>707 | >100 | >100 | >100 |

<sup>1</sup> All compounds were kept at the highest concentration tested in the antibacterial activity (64 µg/mL), considering that none showed a direct inhibitory effect on *E. coli* and *E. faecalis*. **CTX**: cefotaxime; **VAN**: vancomycin. **SE03**: *Salmonella enterica* serovar Typhimurium SL1344 (SE03).

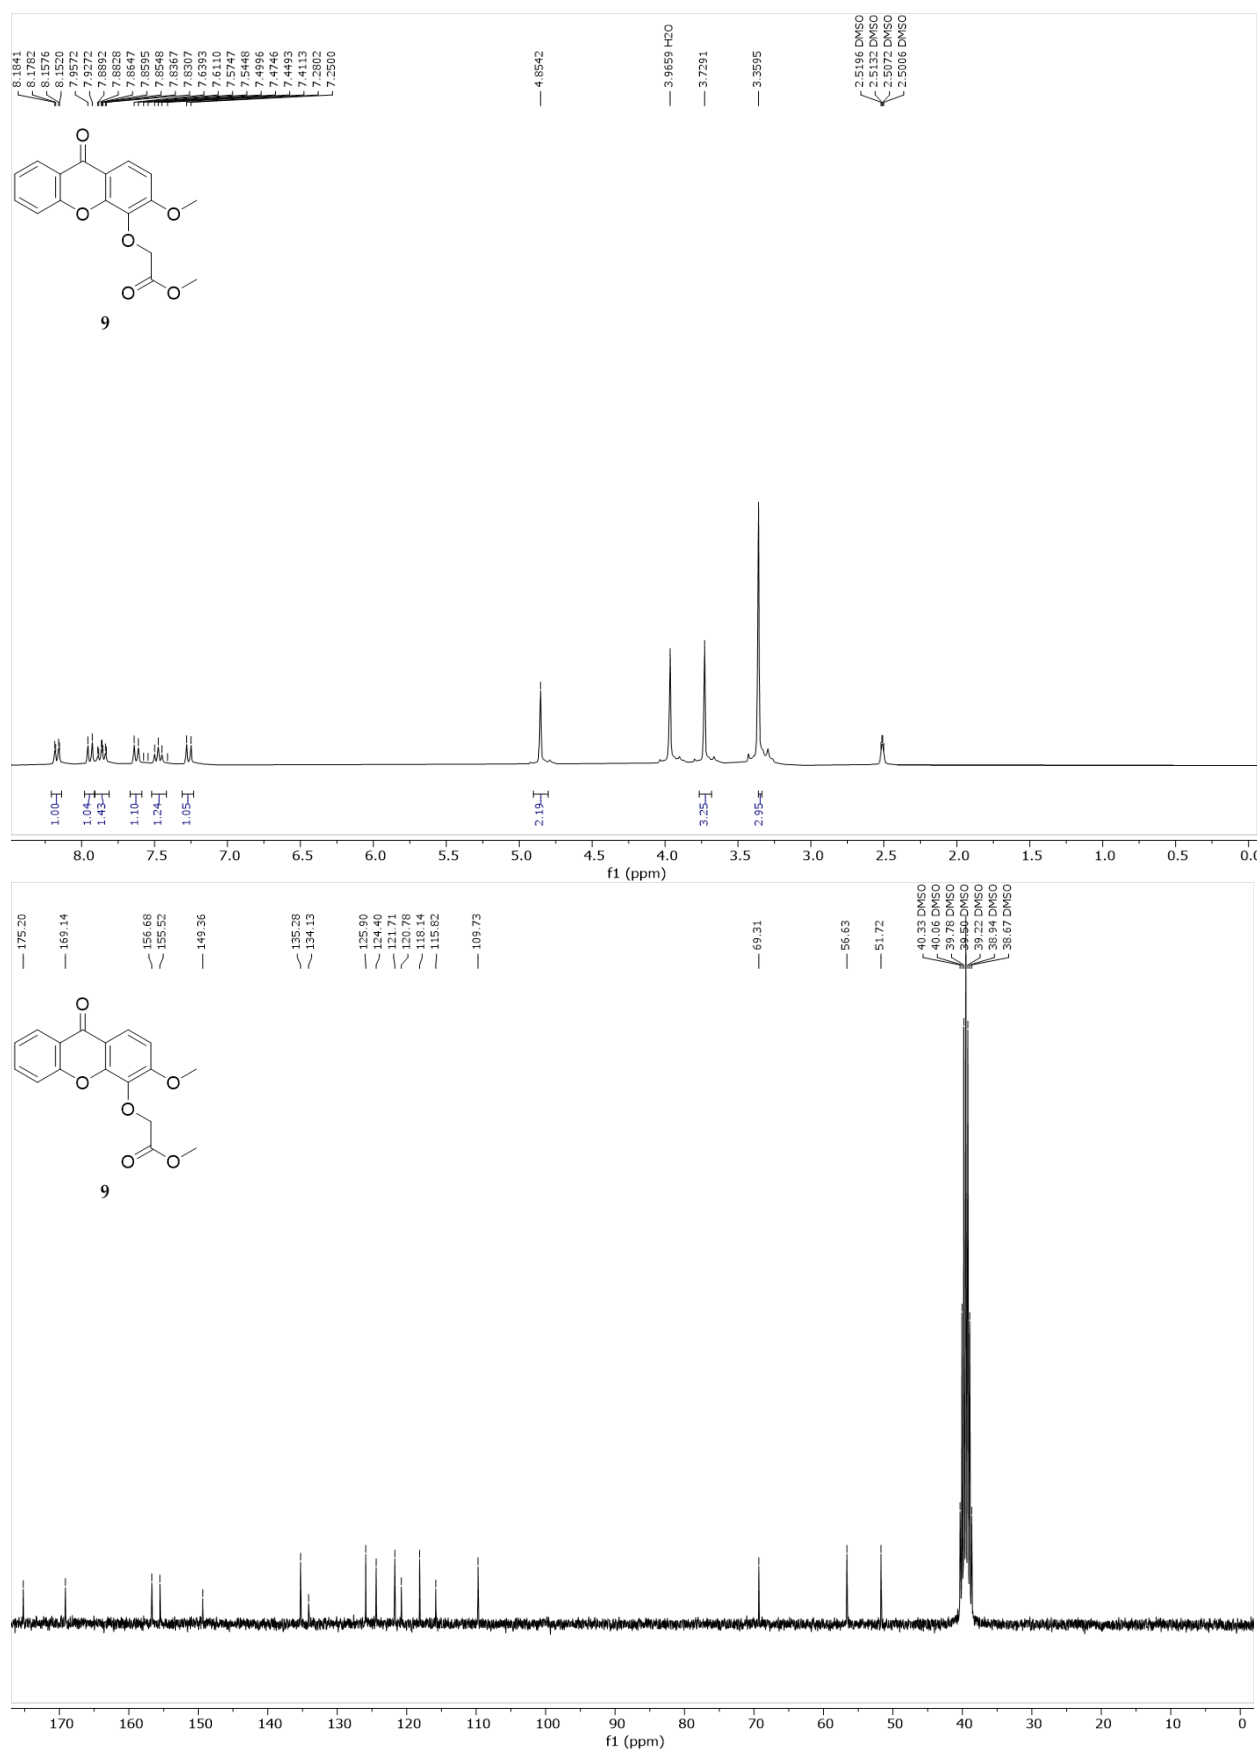

**Figure S1.**  $^1\text{H}$  NMR (300.13 MHz,  $\text{DMSO}-d_6$ ) and  $^{13}\text{C}$  NMR (75.48 MHz,  $\text{DMSO}-d_6$ ) for compound **9**.

T: FTMS + p ESI Full ms [150,0000-2000,0000]

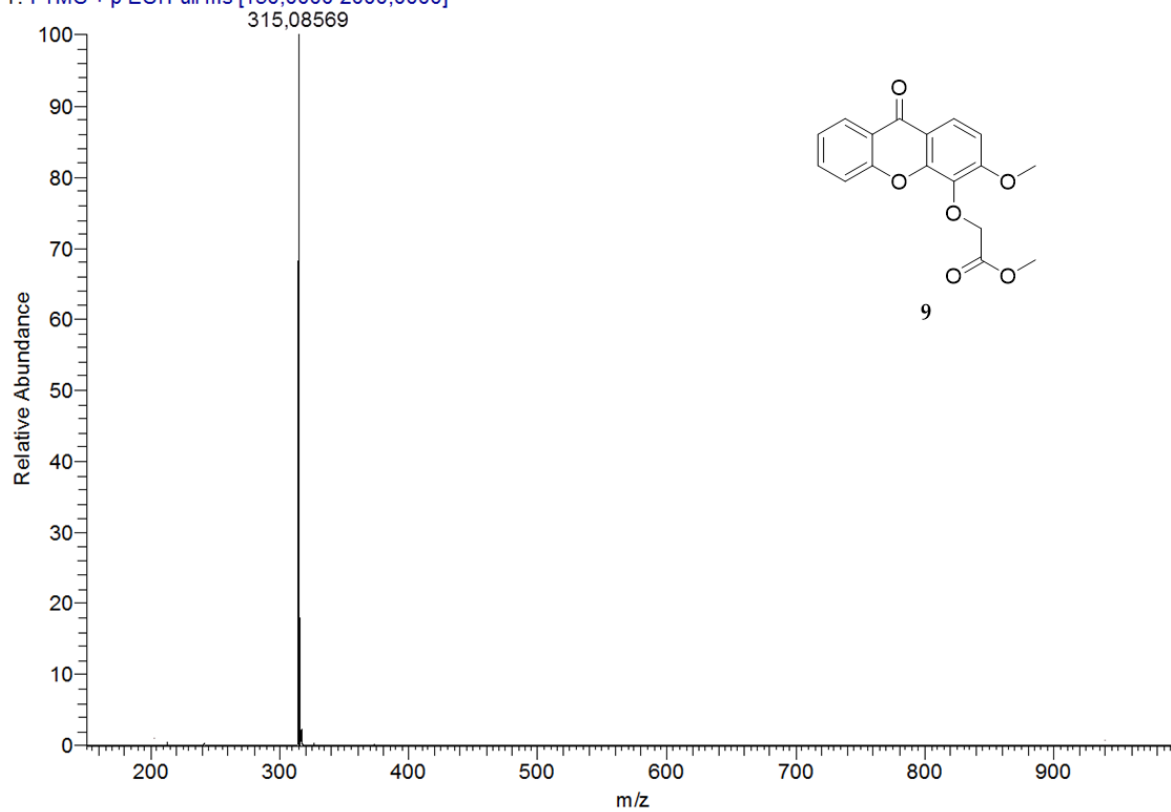

| Meas. m/z | Formula                                        | m/z       | err [ppm] |
|-----------|------------------------------------------------|-----------|-----------|
| 314.07904 | C <sub>17</sub> H <sub>15</sub> O <sub>6</sub> | 315.08569 | 1.982     |

**Figure S2.** Electrospray ESI data for compound 9.

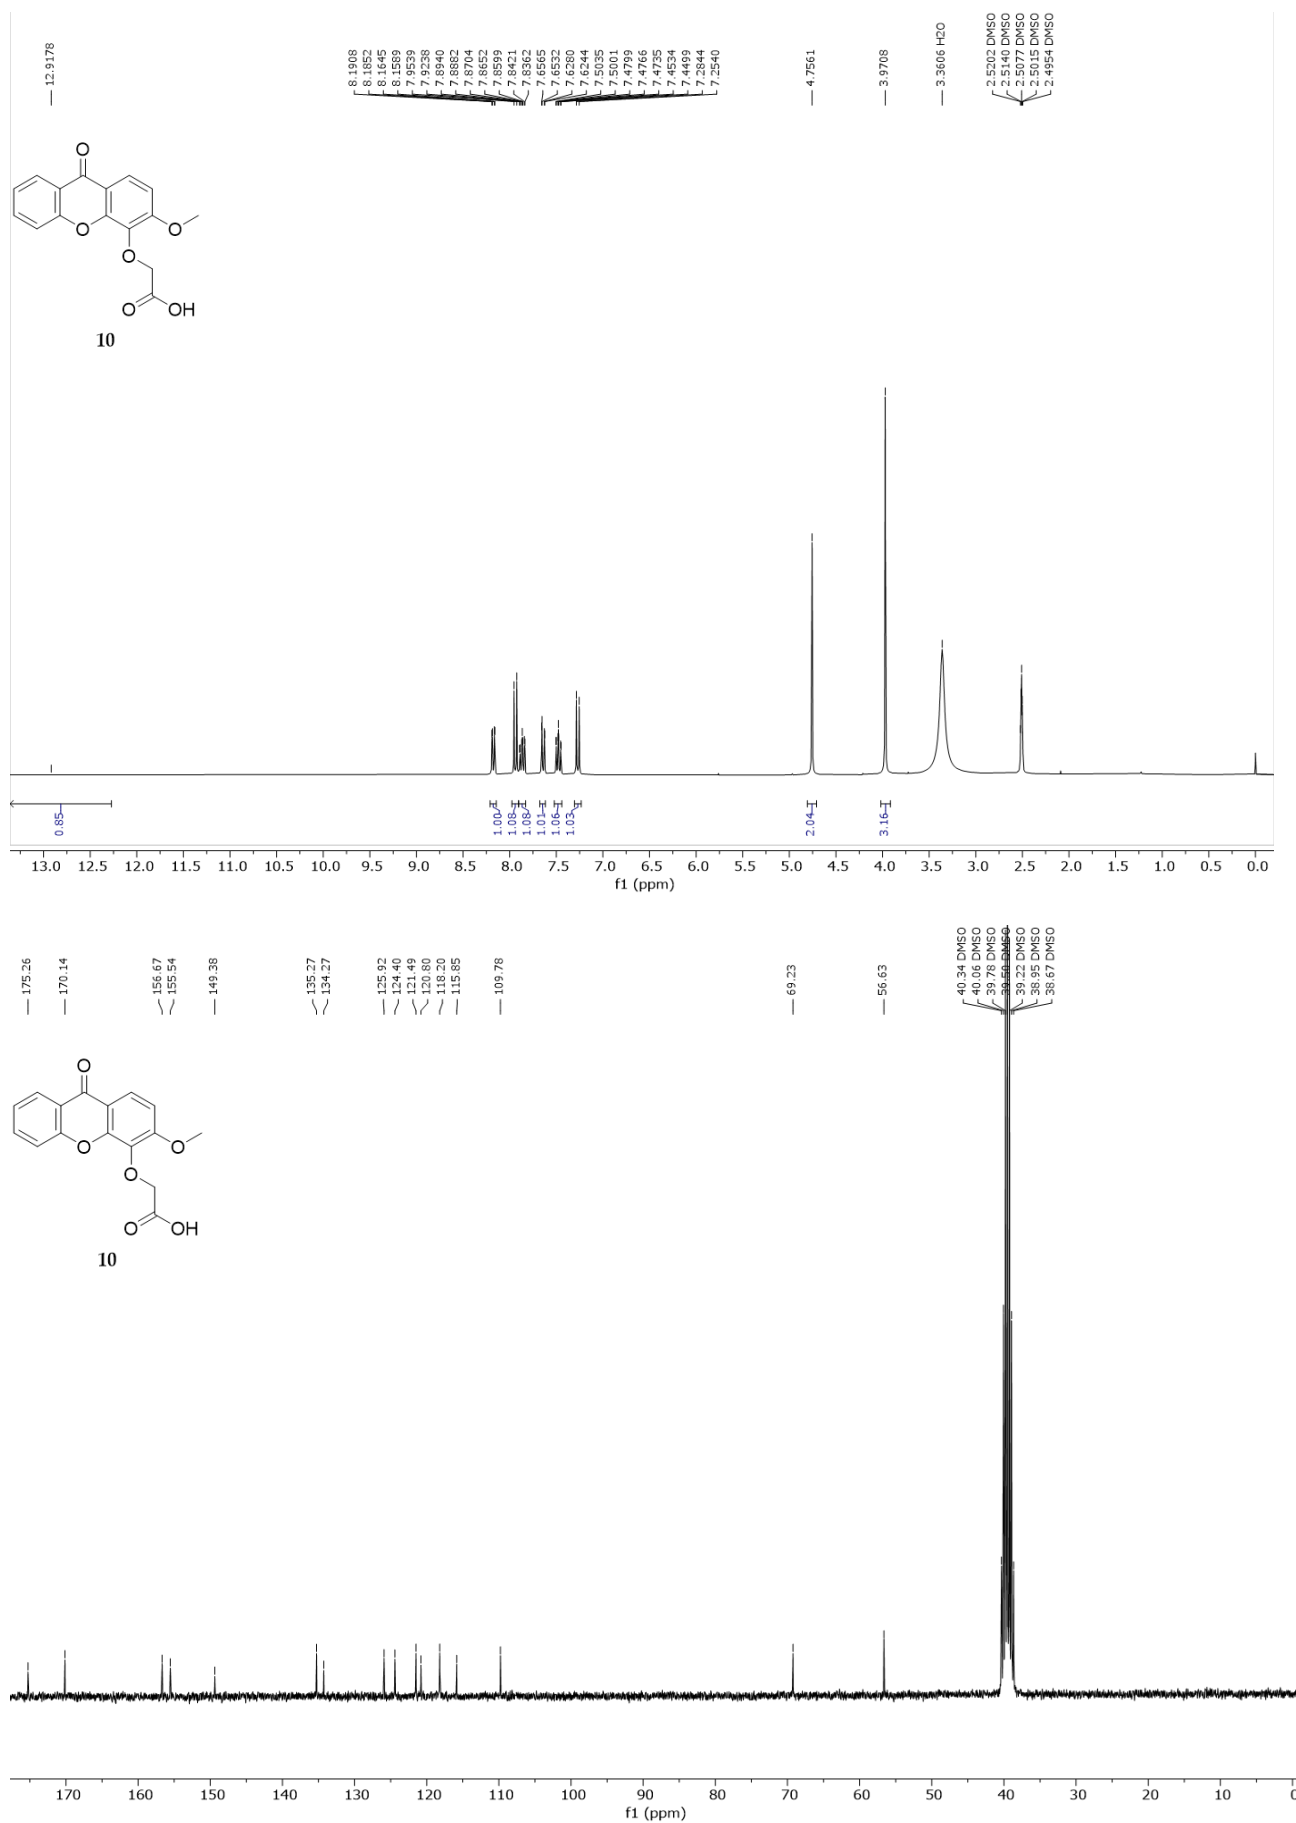

T: FTMS + c ESI Full ms [50,00-2000,00]

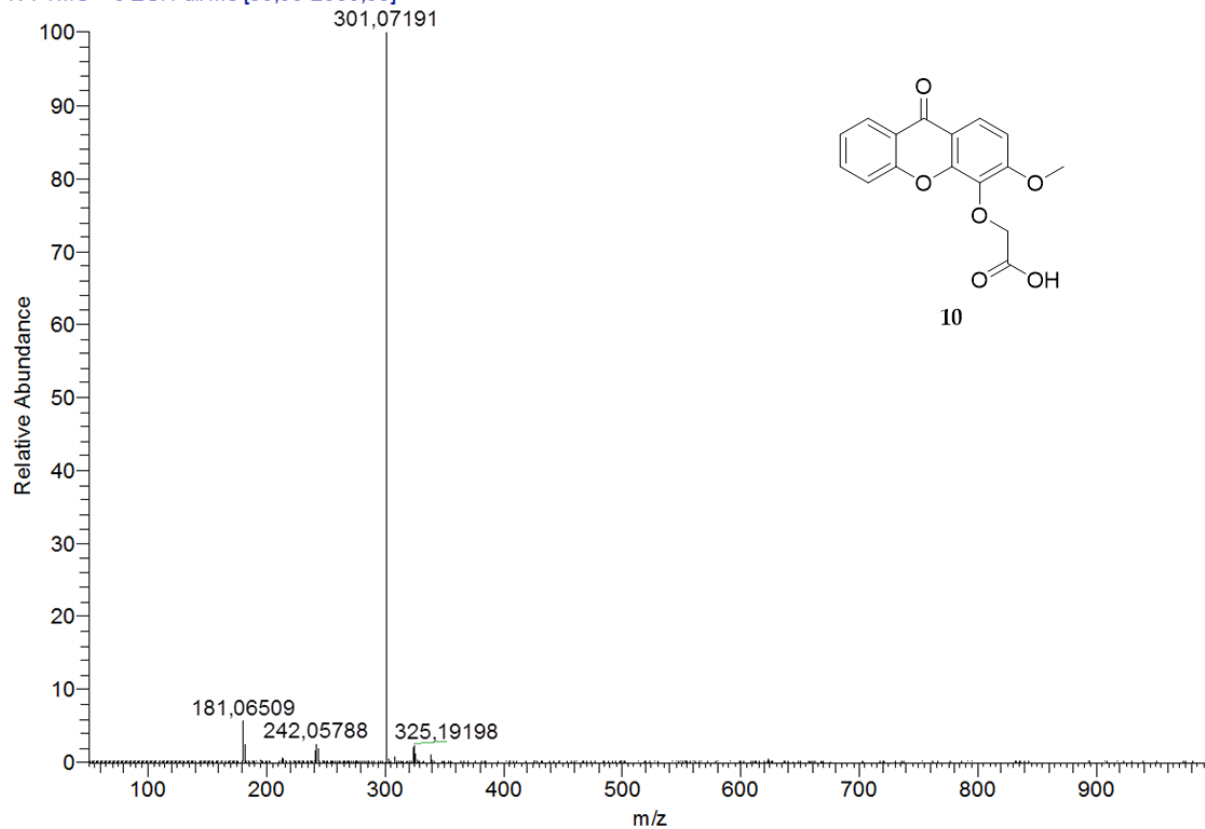

| Meas. m/z | Formula                                        | m/z       | err [ppm] |
|-----------|------------------------------------------------|-----------|-----------|
| 301.07122 | C <sub>16</sub> H <sub>13</sub> O <sub>6</sub> | 301.07191 | 4.137     |

**Figure S4.** Electrospray ESI data for compound 10.

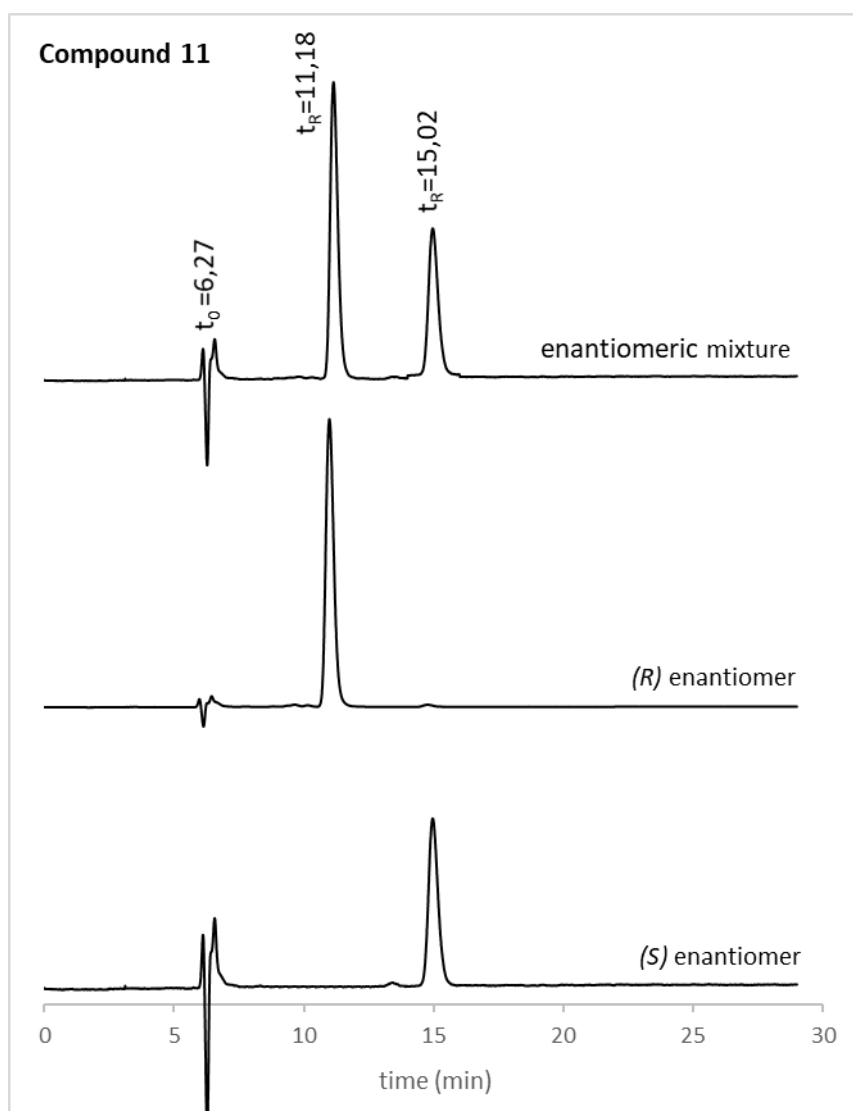

**Figure S5.** Chromatograms for the enantioseparation of the enantiomeric pair **11**, at optimized chromatographic conditions.



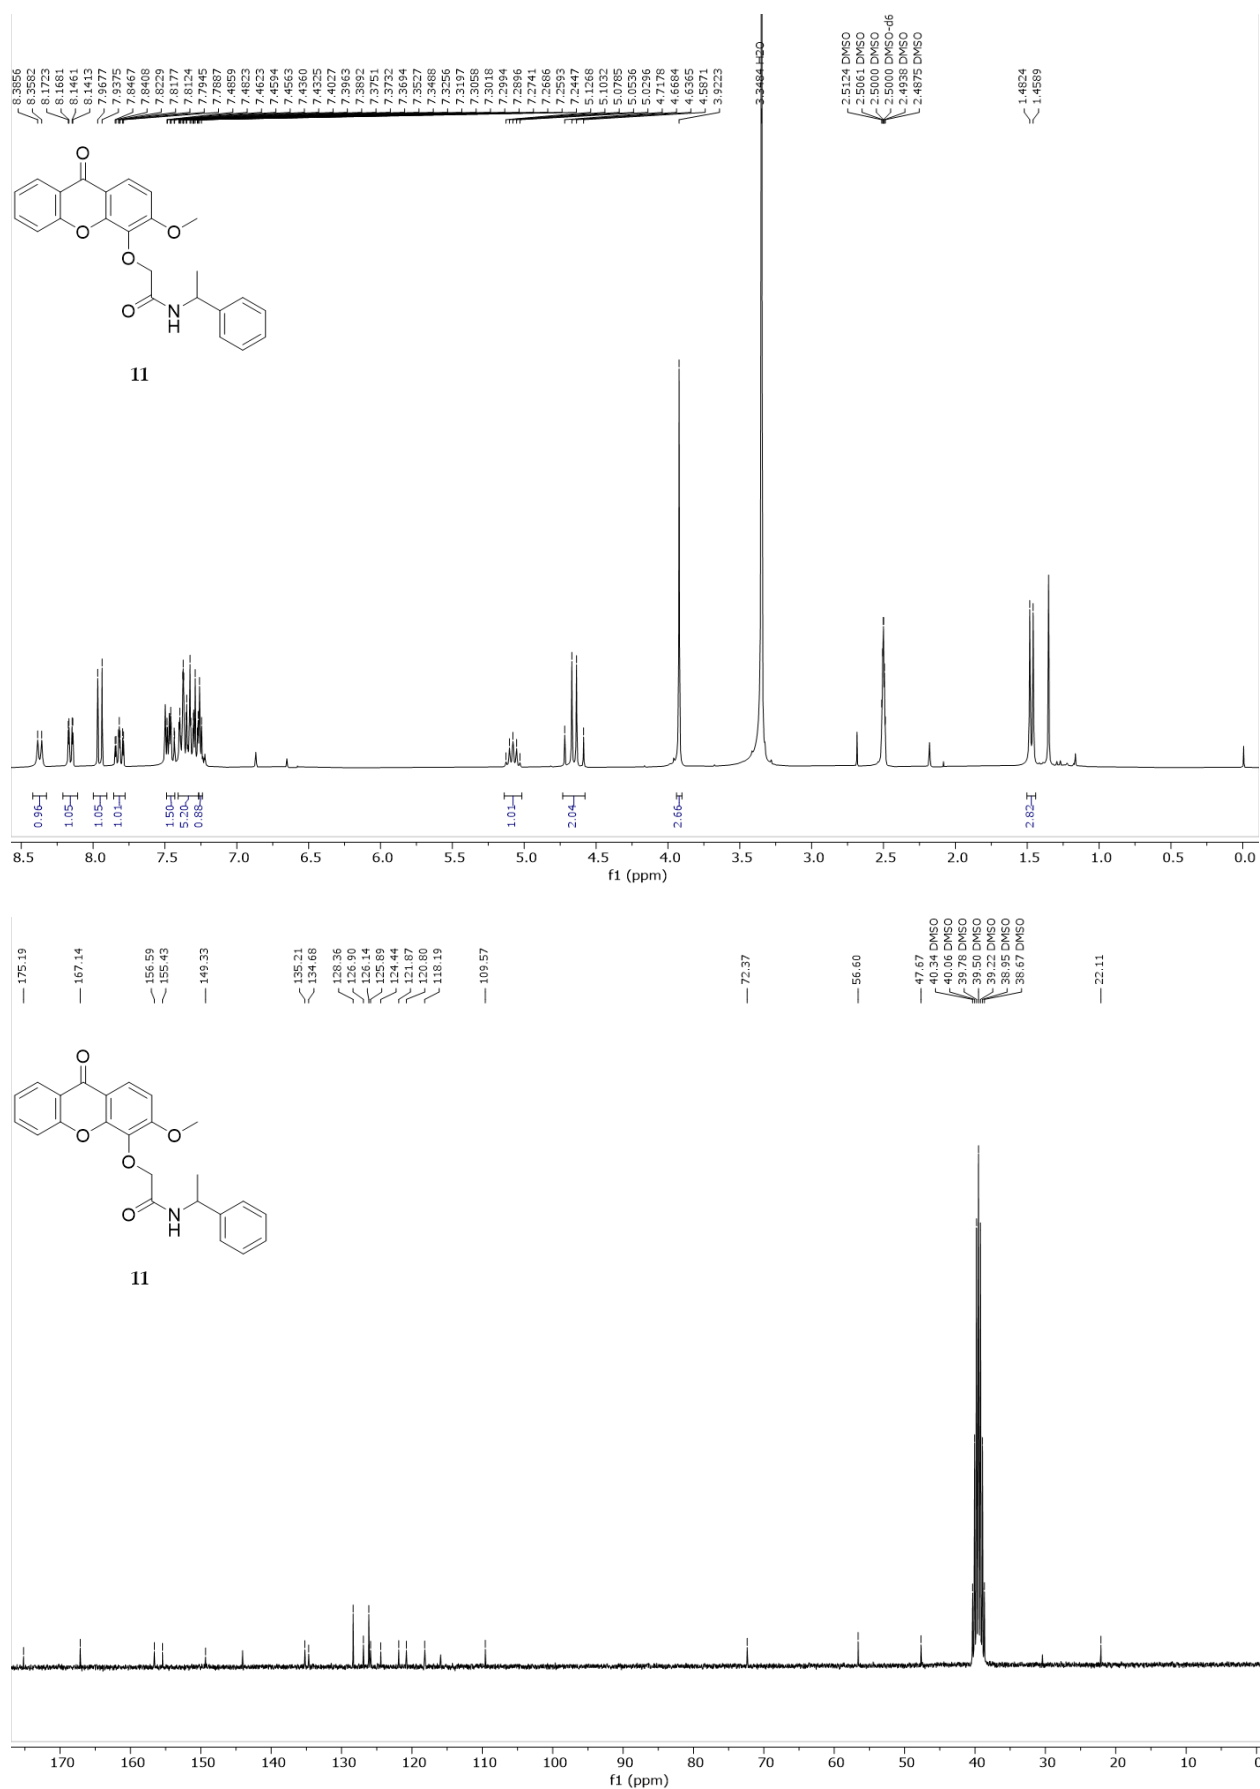

**Figure S6.** <sup>1</sup>H NMR (300.13 MHz, DMSO-*d*<sub>6</sub>) and <sup>13</sup>C NMR (75.48 MHz, DMSO-*d*<sub>6</sub>) for the enantiomeric pair **11**.

T: FTMS + p ESI Full ms [150,0000-2000,0000]

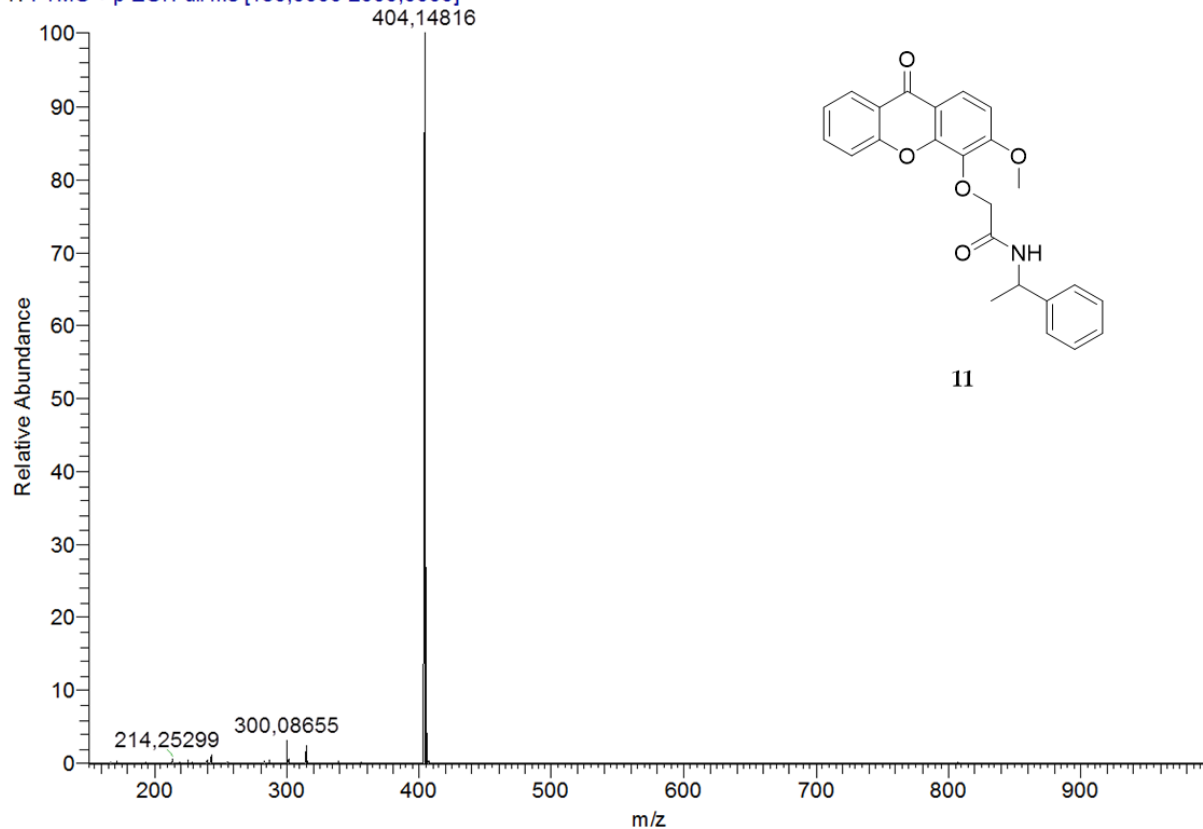

| Meas. m/z | Formula                                         | m/z       | err [ppm] |
|-----------|-------------------------------------------------|-----------|-----------|
| 404.14980 | C <sub>24</sub> H <sub>22</sub> NO <sub>5</sub> | 404.14816 | 2.695     |

Figure S7. Electrospray ESI data for the enantiomeric pair 11.

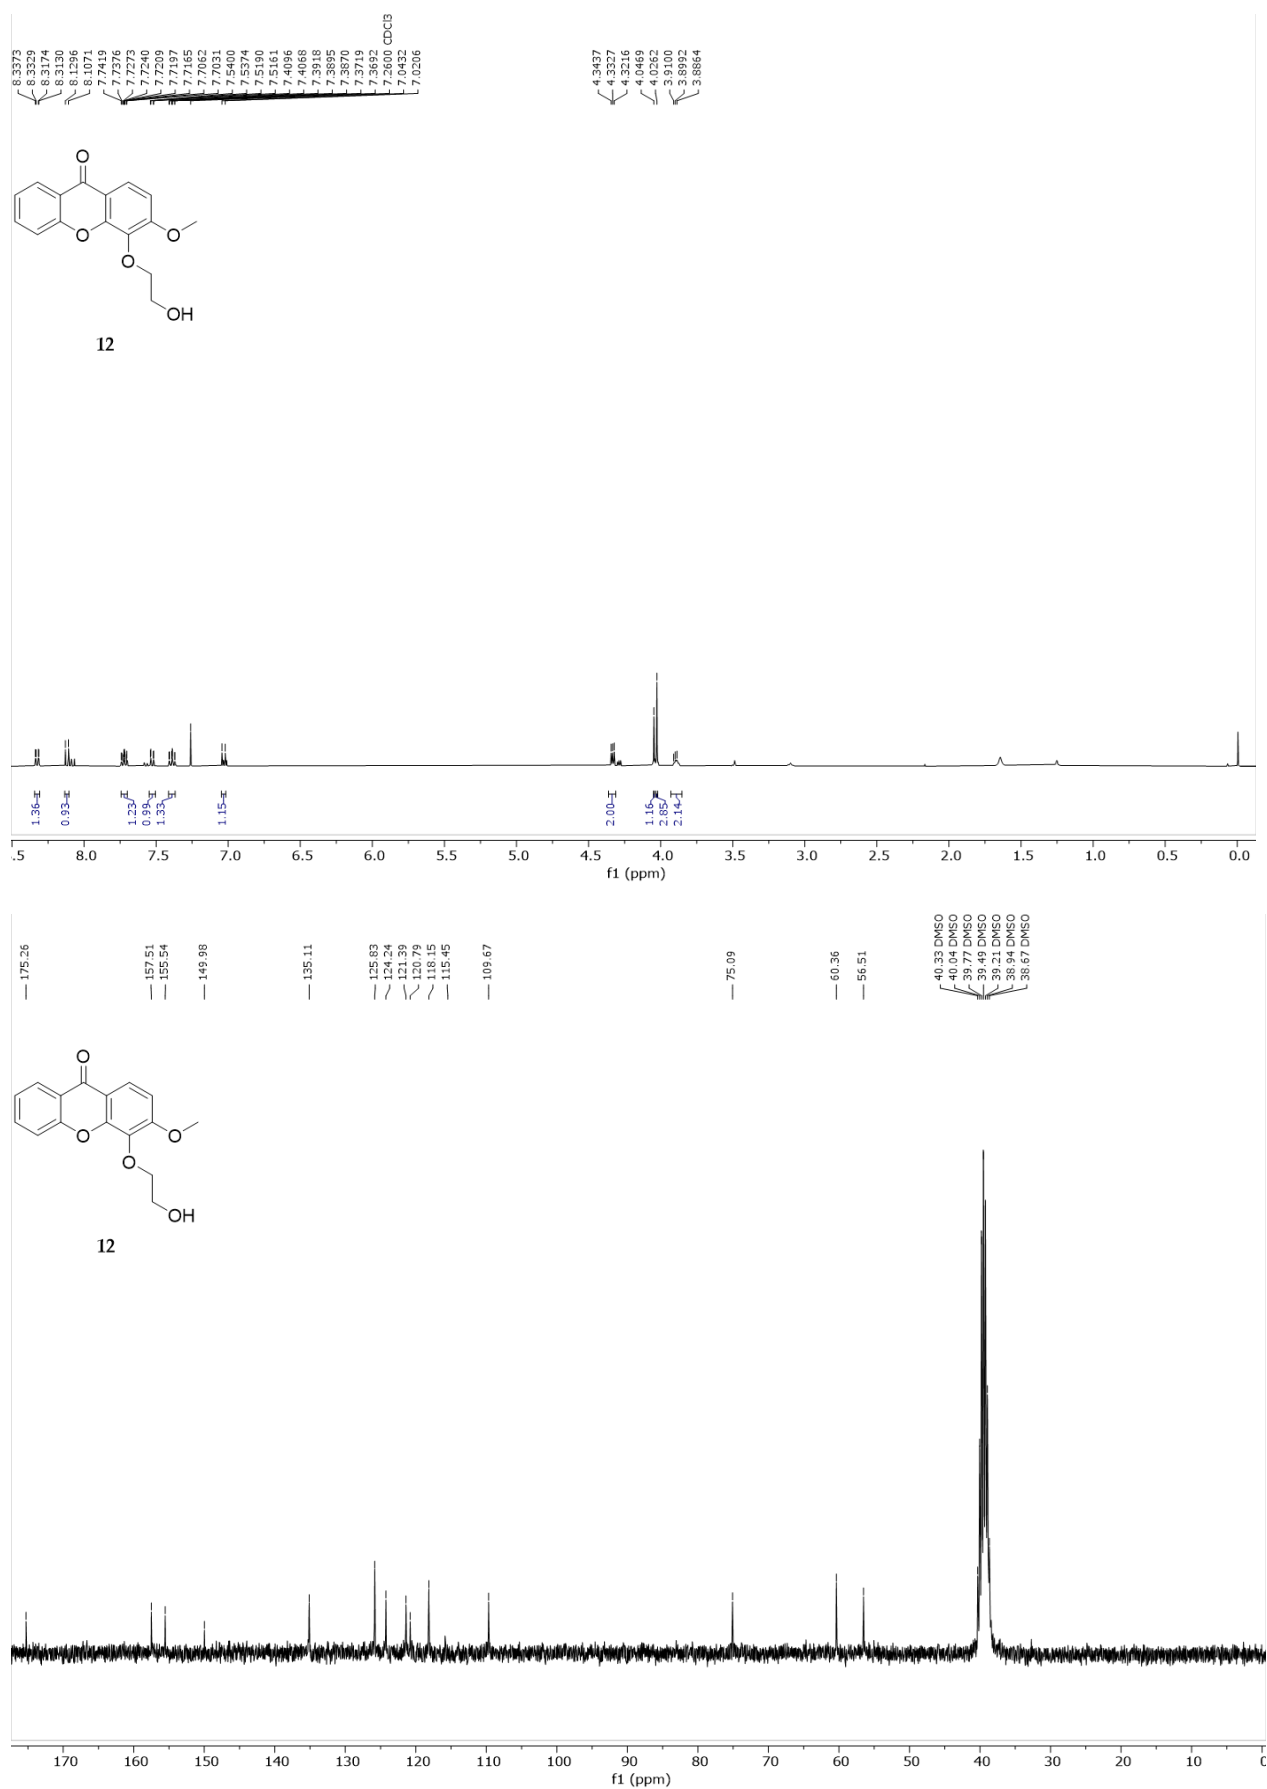

**Figure S8.** <sup>1</sup>H NMR (300.13 MHz, CDCl<sub>3</sub>) and <sup>13</sup>C NMR (75.48 MHz, DMSO-*d*<sub>6</sub>) for compound 12.

T: FTMS + p ESI Full ms [150,0000-2000,0000]

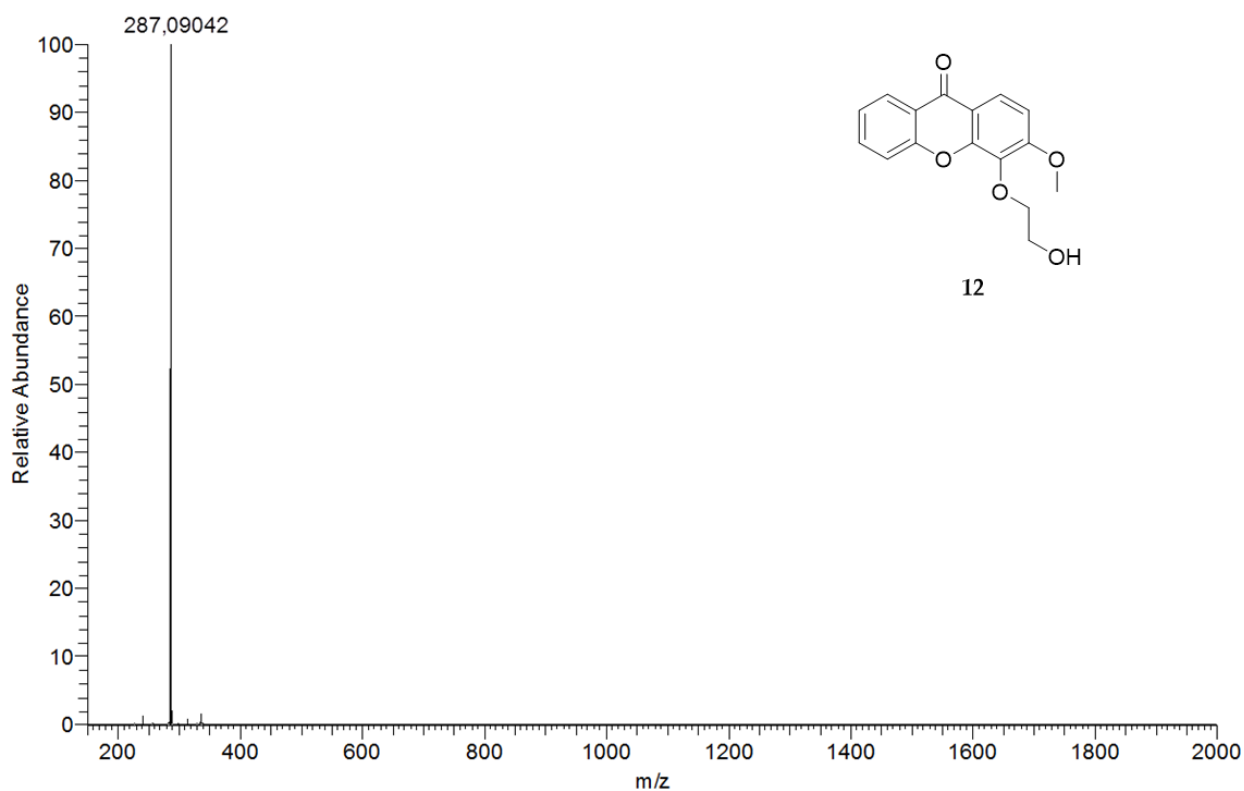

| Meas. m/z | Formula                                        | m/z       | err [ppm] |
|-----------|------------------------------------------------|-----------|-----------|
| 287.09195 | C <sub>16</sub> H <sub>15</sub> O <sub>5</sub> | 287.09042 | -3.414    |

Figure S9. Electrospray ESI data for compound 12.

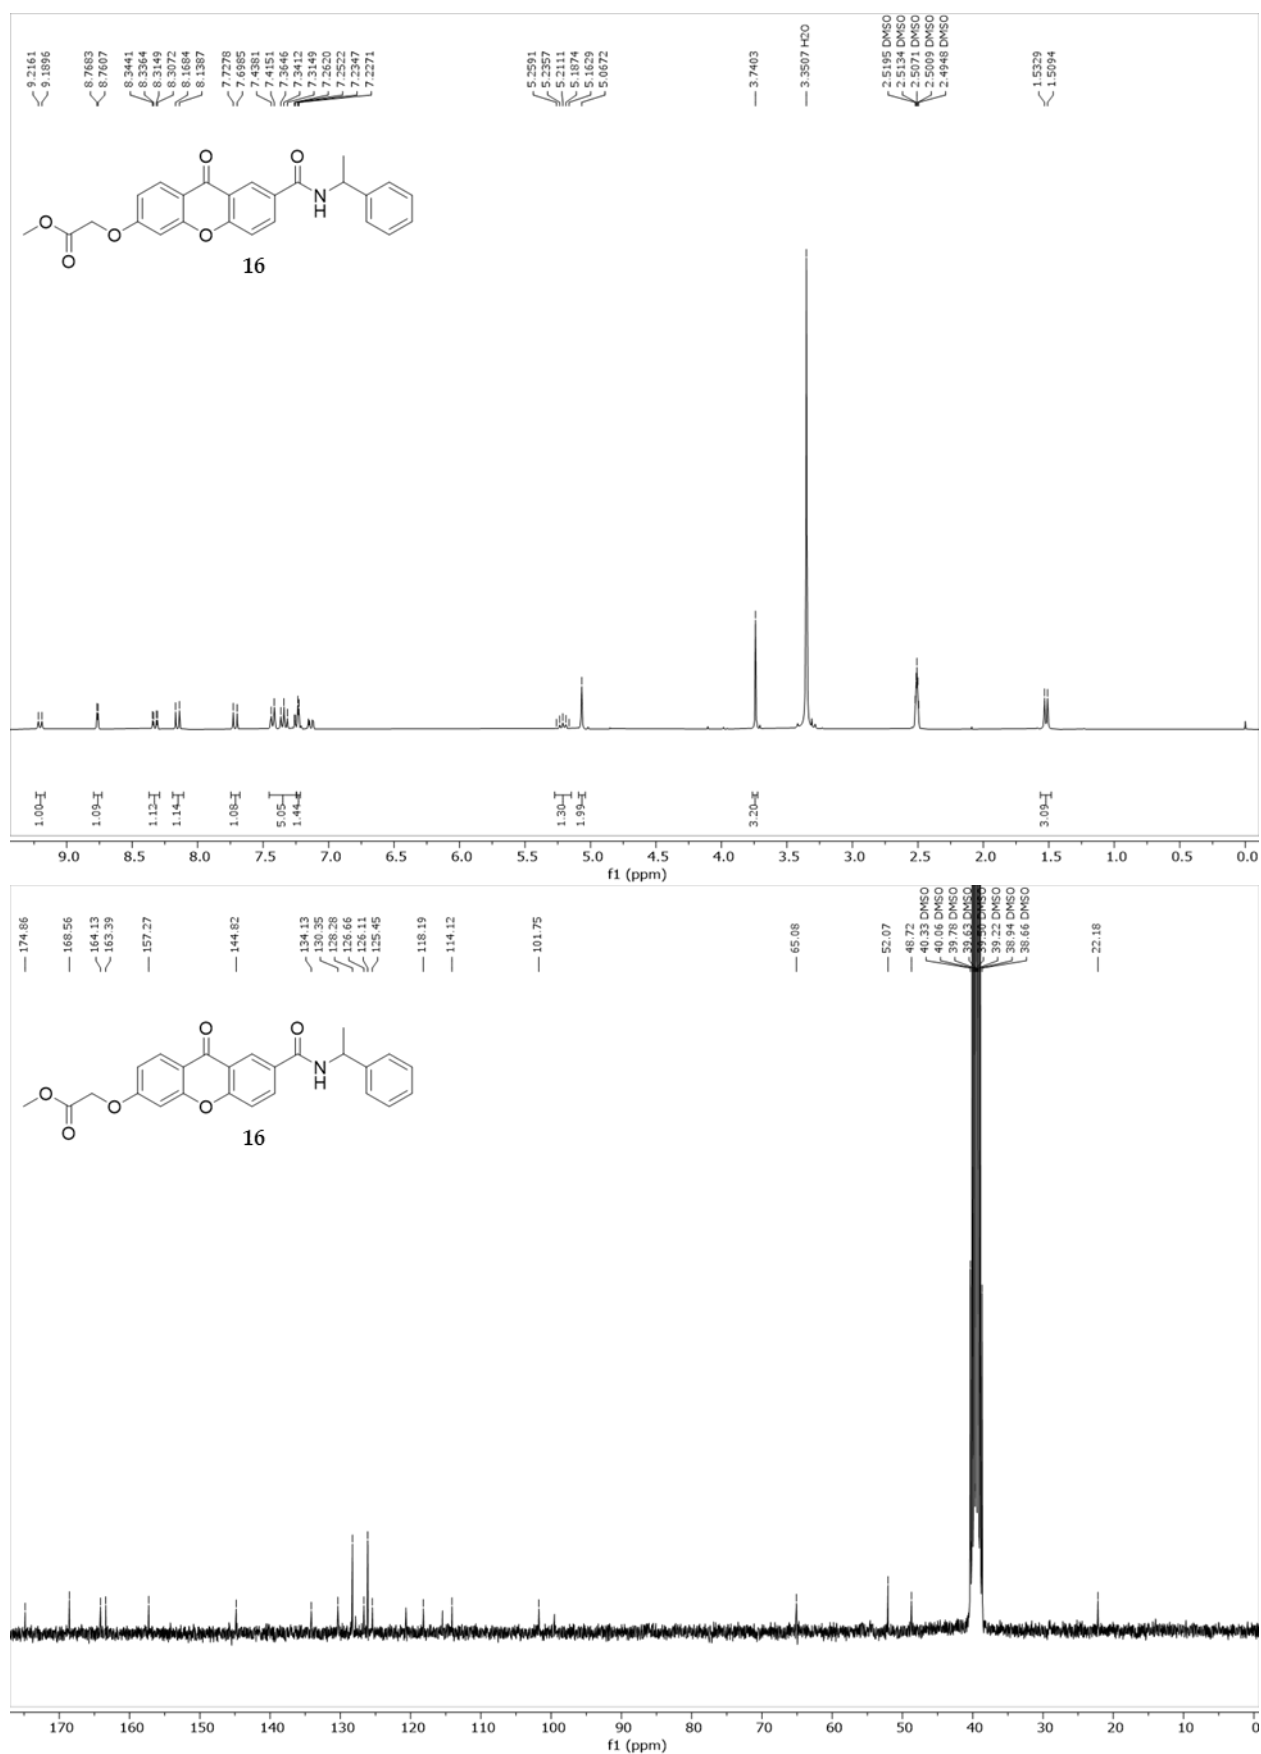

**Figure S10.** <sup>1</sup>H NMR (300.13 MHz, DMSO-*d*<sub>6</sub>) and <sup>13</sup>C NMR (75.48 MHz, DMSO-*d*<sub>6</sub>) for the enantiomeric pair **16**.

T: FTMS + p ESI Full ms [150,0000-2000,0000]

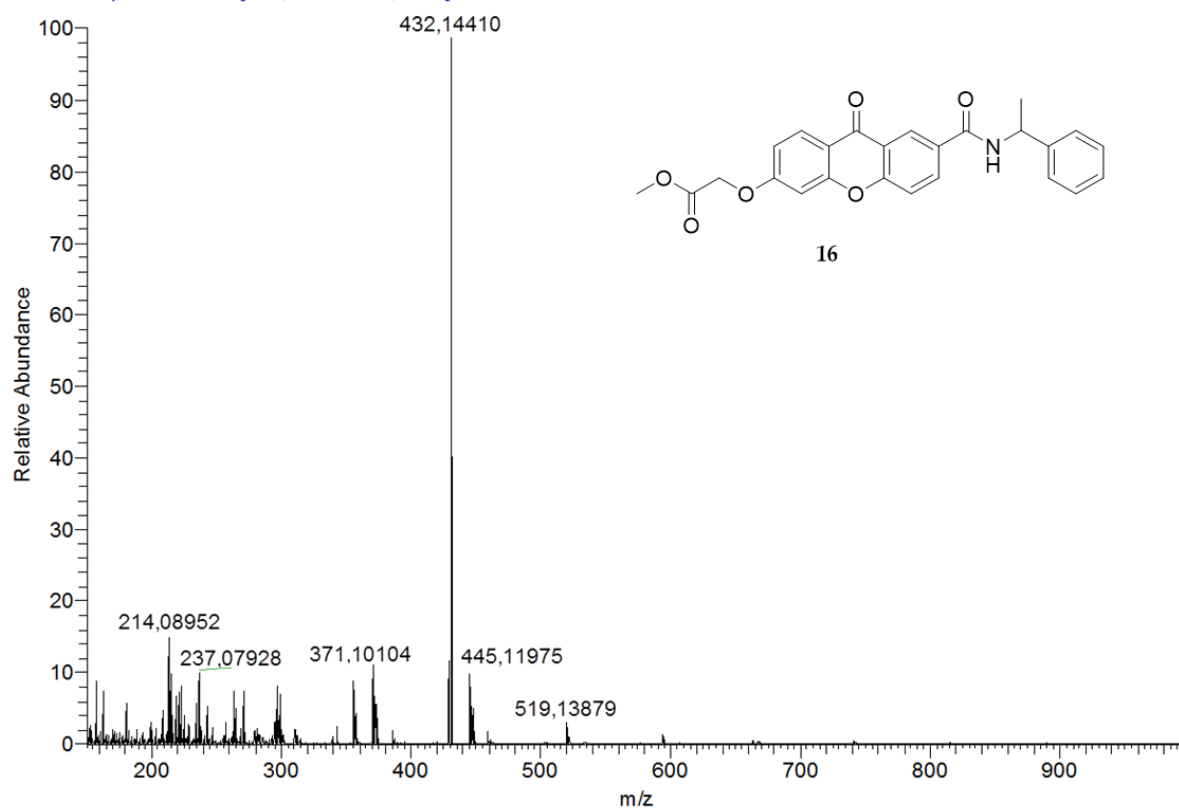

| Meas. m/z | Formula                                         | m/z       | err [ppm] |
|-----------|-------------------------------------------------|-----------|-----------|
| 432.14471 | C <sub>25</sub> H <sub>22</sub> NO <sub>6</sub> | 432.14410 | -0.148    |

**Figure S11.** Electrospray ESI data for the enantiomeric pair **16**.

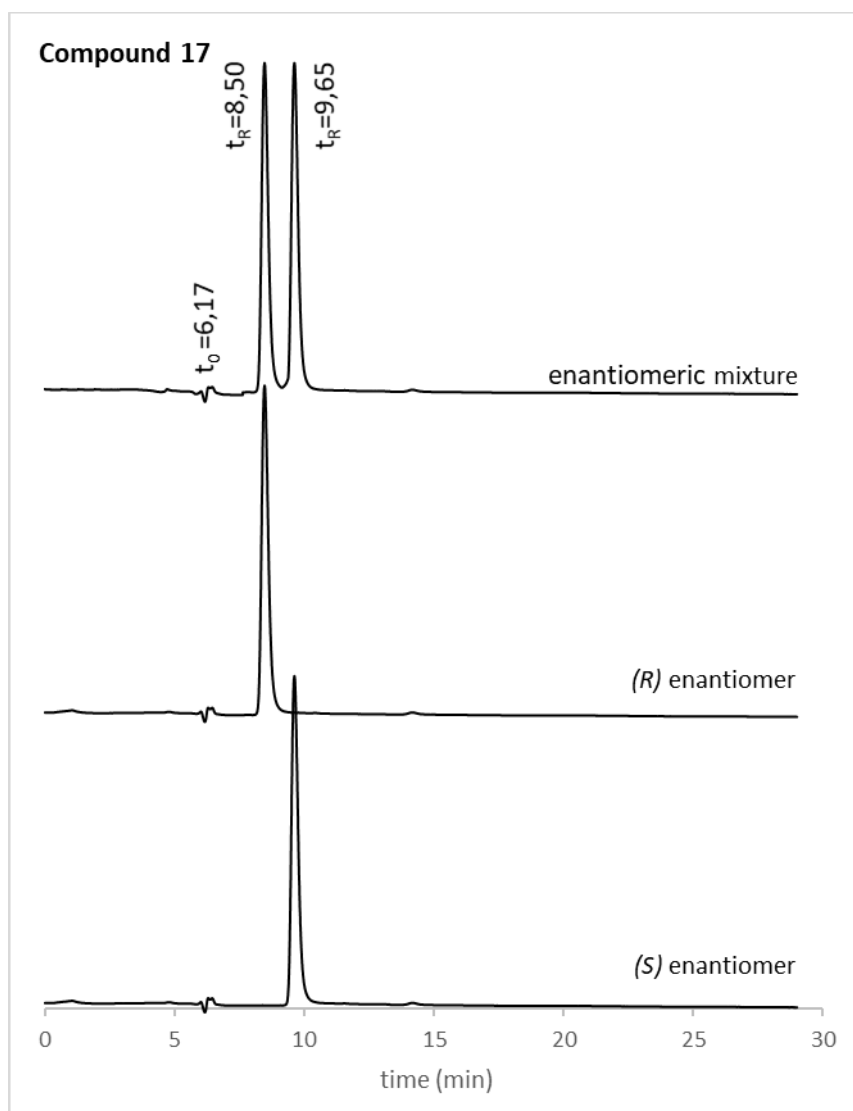

**Figure S12.** Chromatograms for the enantioseparation of the enantiomeric pair **17**, at optimized chromatographic conditions

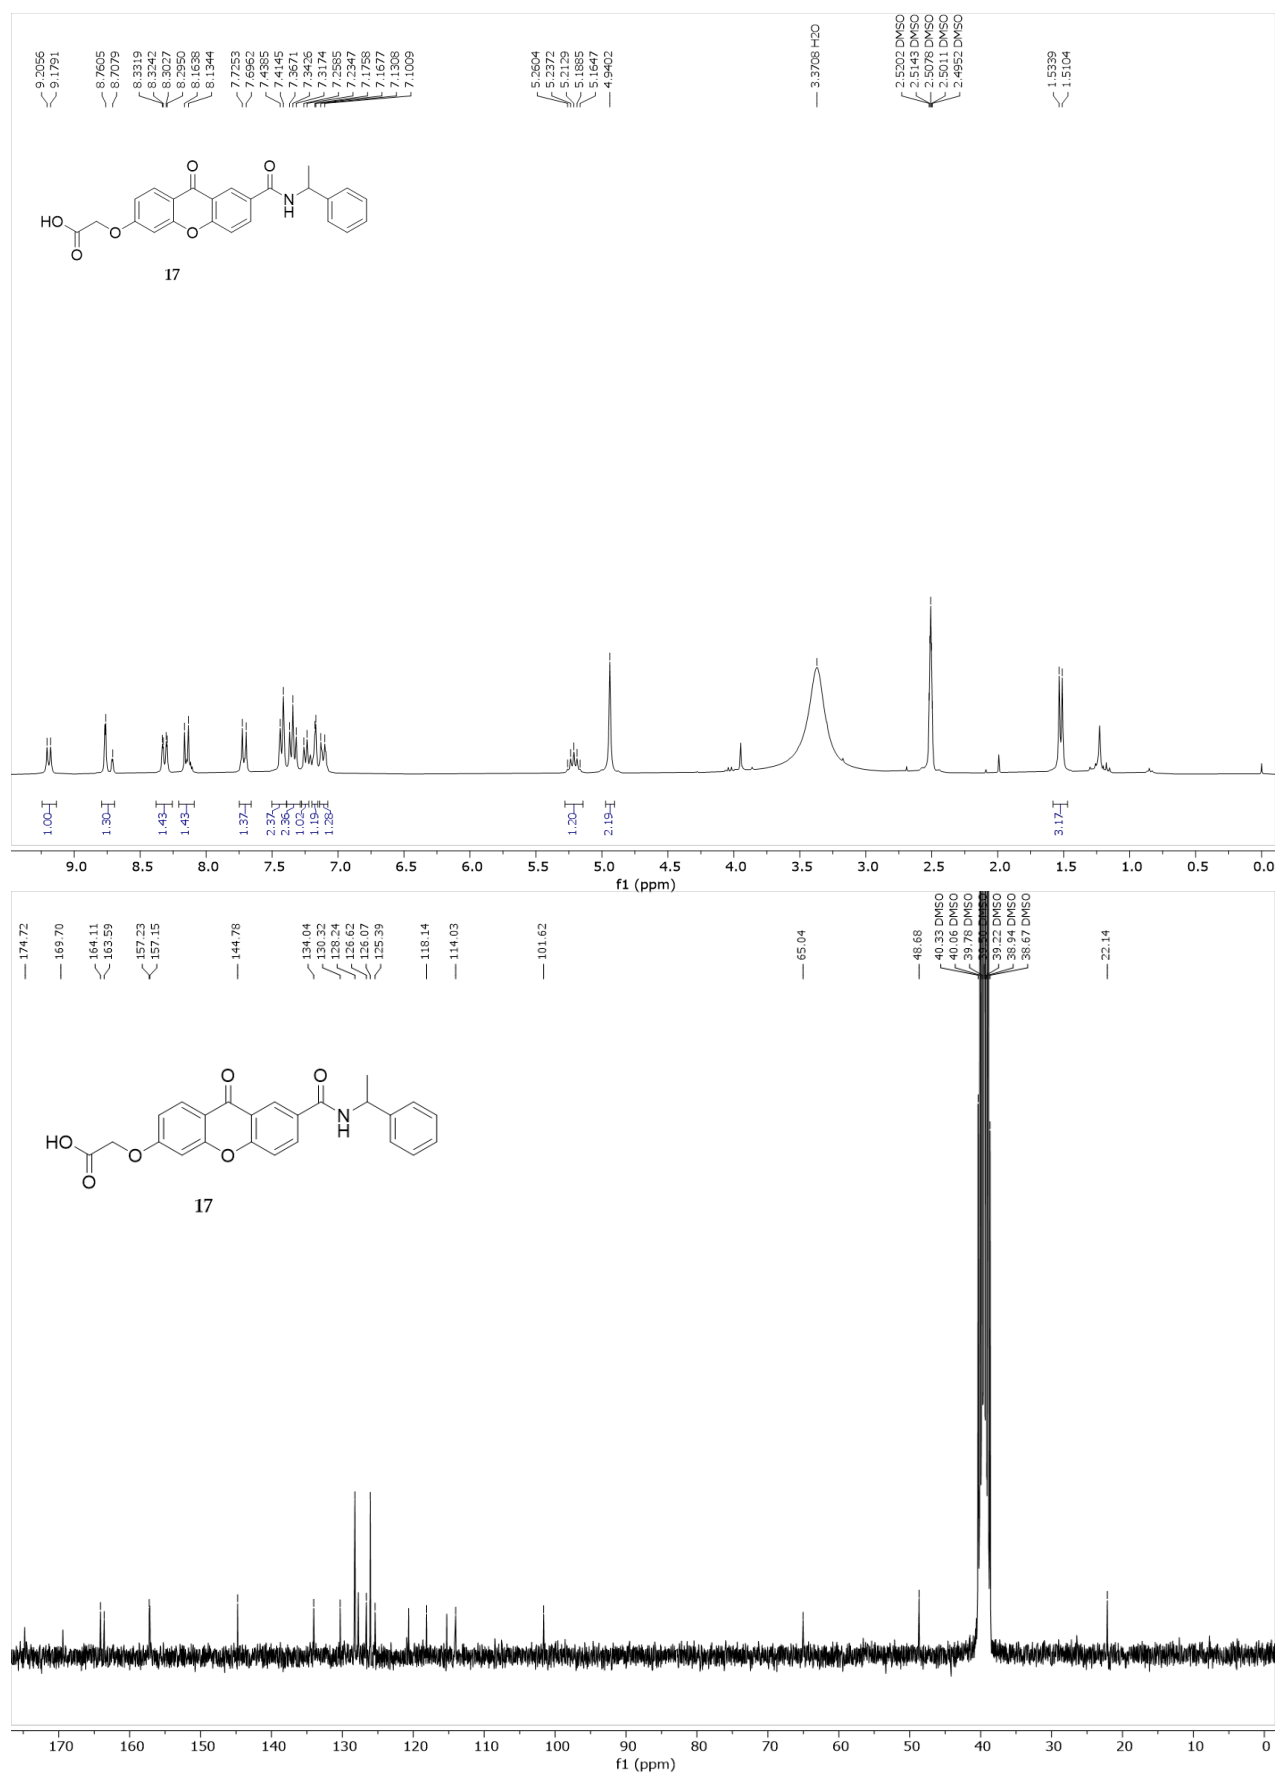

**Figure S13.**  $^1\text{H}$  NMR (300.13 MHz, DMSO- $d_6$ ) and  $^{13}\text{C}$  NMR (75.48 MHz, DMSO- $d_6$ ) for the enantiomeric pair 17.



T: FTMS + p ESI Full ms [150,0000-2000,0000]

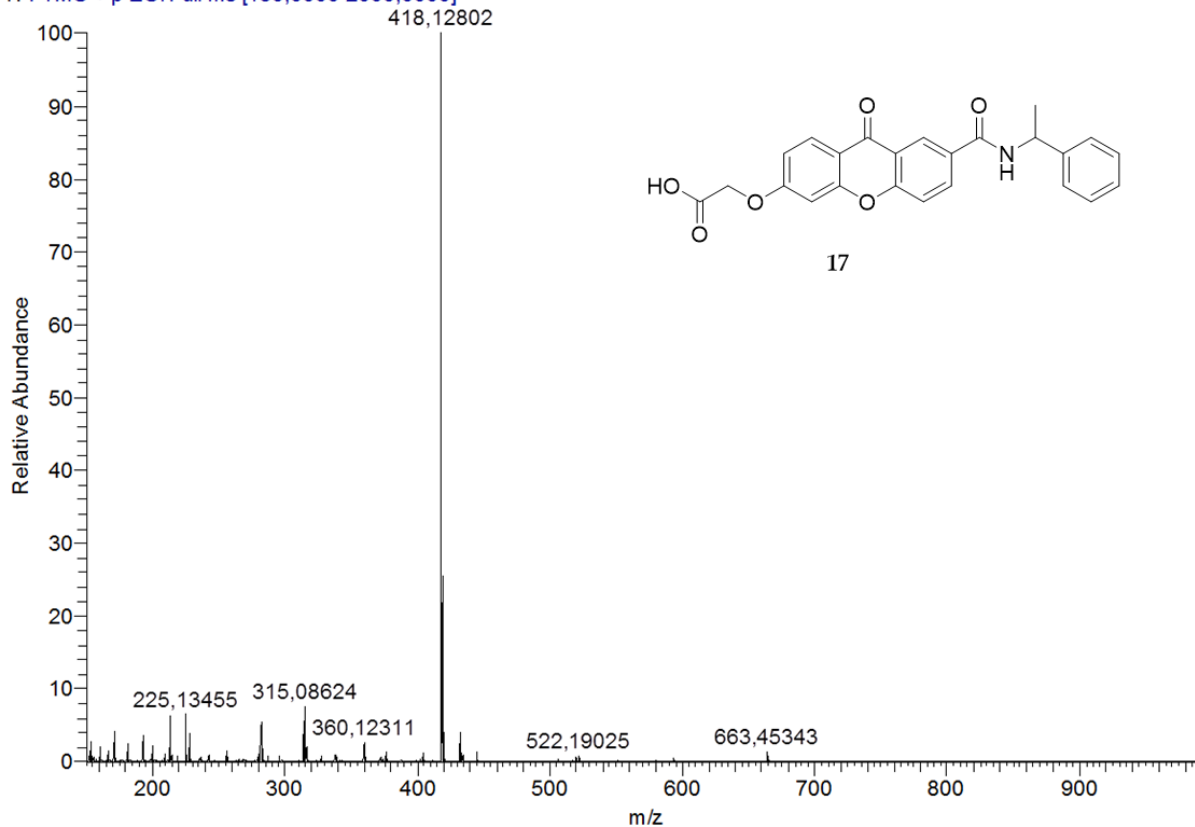

| Meas. m/z | Formula                                         | m/z       | err [ppm] |
|-----------|-------------------------------------------------|-----------|-----------|
| 418.12906 | C <sub>24</sub> H <sub>20</sub> NO <sub>6</sub> | 418.12802 | -1.191    |

Figure S14. Electrospray ESI data for the enantiomeric pair 17.

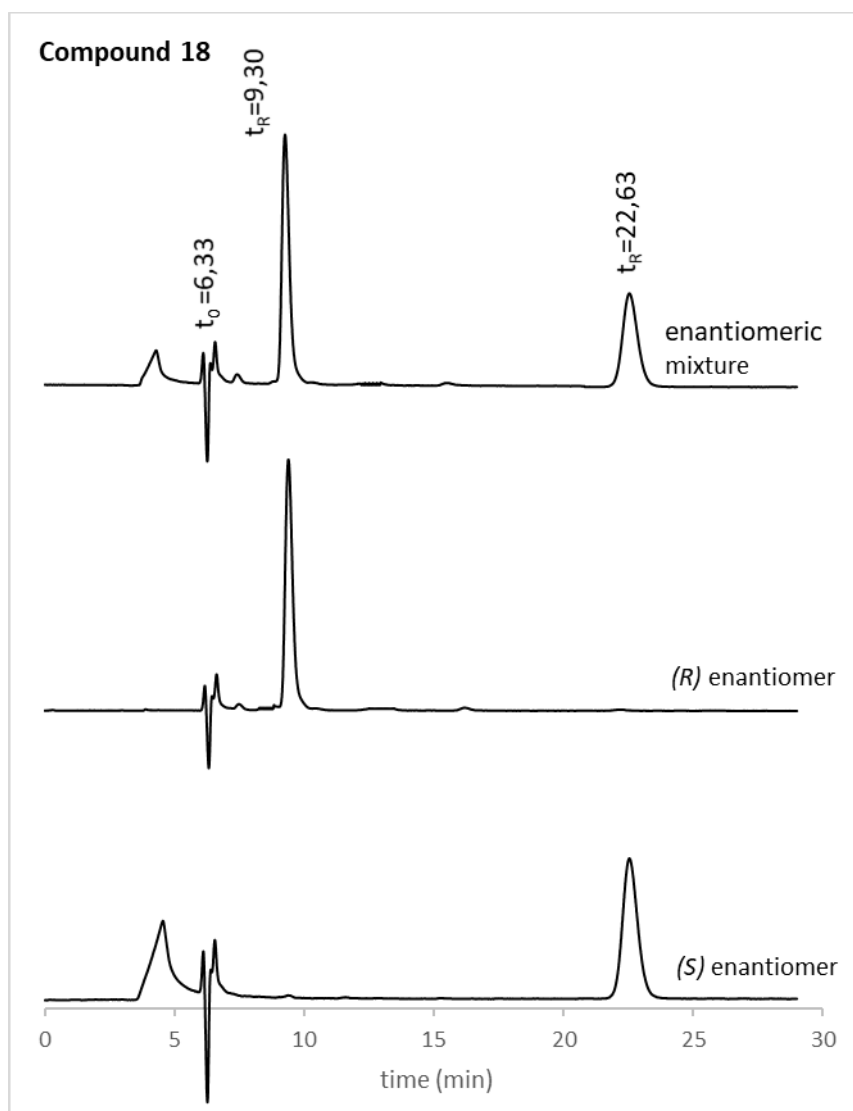

**Figure S15.** Chromatograms for the enantioseparation of the enantiomeric pair **18**, at optimized chromatographic conditions.

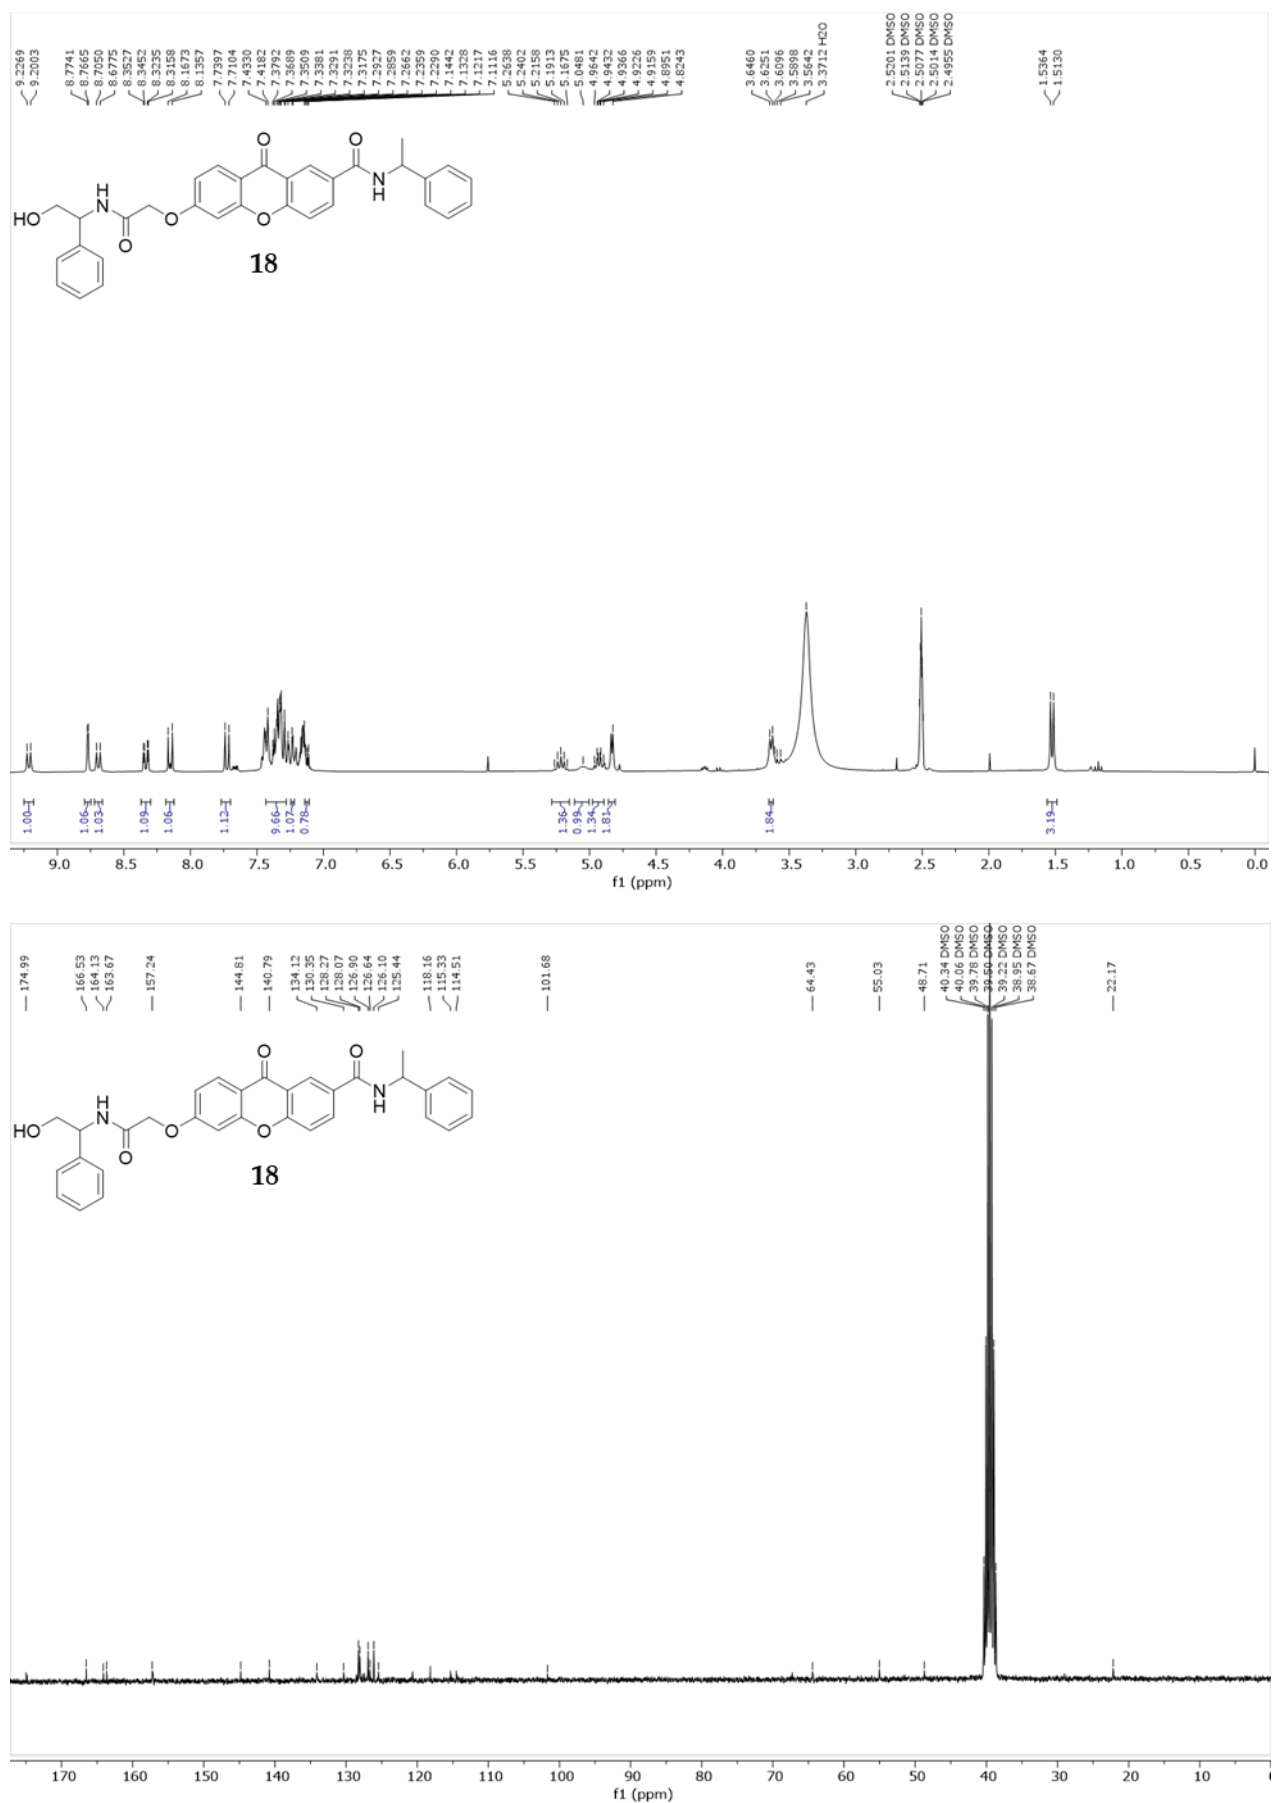

**Figure S16.** <sup>1</sup>H NMR (300.13 MHz, DMSO-*d*<sub>6</sub>) and <sup>13</sup>C NMR (75.48 MHz, DMSO-*d*<sub>6</sub>) for the enantiomeric pair 18.

T: FTMS + p ESI Full ms [150,0000-2000,0000]

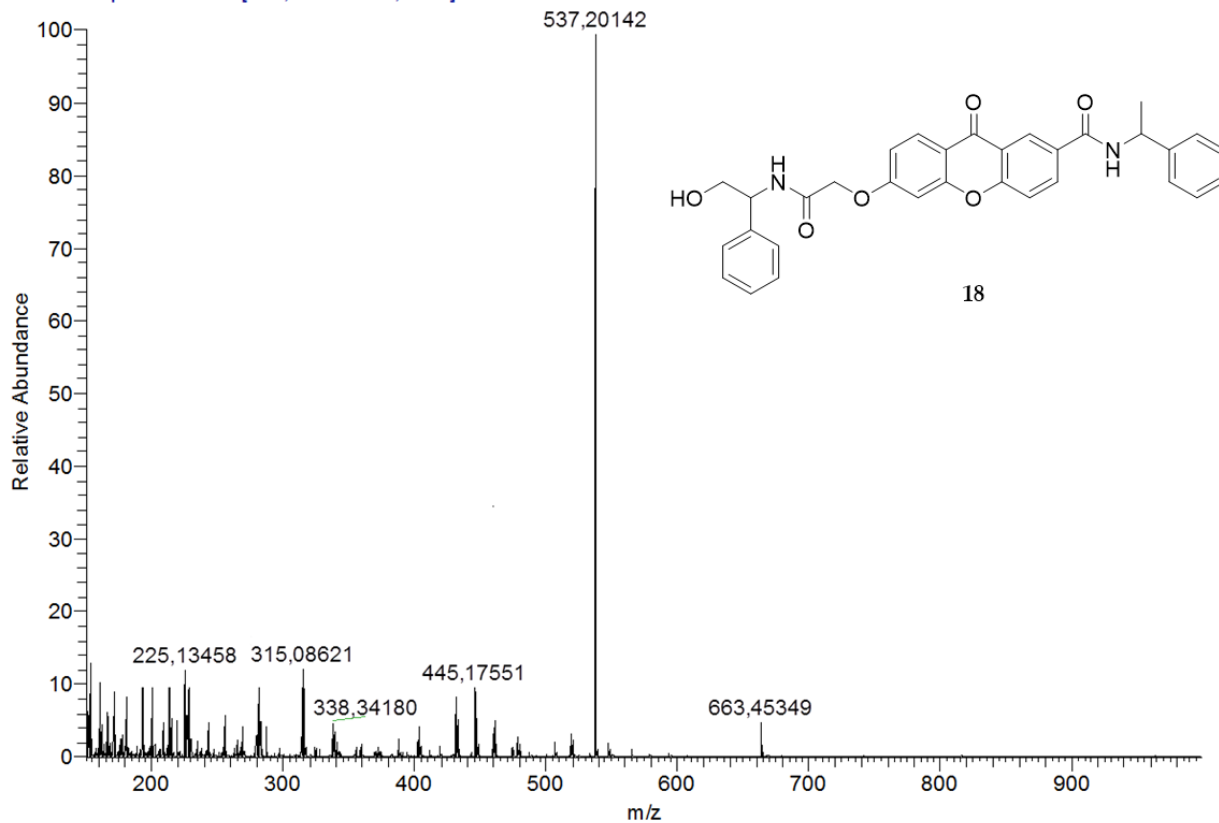

| Meas. m/z | Formula                                                       | m/z       | err [ppm] |
|-----------|---------------------------------------------------------------|-----------|-----------|
| 537.20256 | C <sub>32</sub> H <sub>29</sub> N <sub>2</sub> O <sub>6</sub> | 537.20142 | -1.104    |

Figure S17. Electrospray ESI data for the enantiomeric pair **18**.
